# Supplementary material for: Impacts of land-use history on the recovery of ecosystems after agricultural abandonment
Source: Copernicus journal article supplement (doi:10.5194/esd-2016-11), 2016-04-14
Supplement: Supplementary file [file esd-2016-11-AC3-supplement.pdf]

Table 2: Observations and LPJ-GUESS results of soil C changes during agriculture (cropland and/or pasture) and vegetation and soil C recovery after abandonment.

| Observation type                                   | Biome            | Observation value                                                                  | Closest simulations in terms of LU history | Average model value for the specific biome                                     | Reference                   |
|----------------------------------------------------|------------------|------------------------------------------------------------------------------------|--------------------------------------------|--------------------------------------------------------------------------------|-----------------------------|
| soil C changes during agriculture                  |                  |                                                                                    |                                            |                                                                                |                             |
| soil C change averaged over different depths       | global           | 42 % loss for forest-cropland conversions, 8 % gain for forest-pasture conversions | P20, P60, P100, C20, C60, C100             | 7-17 % loss in forest biomes for croplands, 2 % gain to 7 % loss for pastures  | Guo and Gifford (2002)      |
| soil C change at 36 cm                             | tropical forest  | 25 % loss for cropland, 12 % loss for pasture/grassland                            | C20, C60, P20, P60                         | 11-12 % loss for croplands, 2 % gain to 4 % loss for pastures                  | Don et al. (2011)           |
| soil C change at 29 cm                             | temperate forest | new equilibrium after 23 years                                                     | C100                                       | C loss throughout the entire cropland duration                                 | Poeplau et al. (2011)       |
| vegetation recovery after agricultural abandonment |                  |                                                                                    |                                            |                                                                                |                             |
| ag vegetation recovery time                        | tropical forest  | 189 years                                                                          | C20                                        | 121 years                                                                      | Saldarriaga et al. (1988)   |
| ag vegetation recovery rate                        | tropical forest  | slowdown with time, recovery slower for pasture than for cropland                  | P20, P60, P100, C20, C60, C100             | (slight) slowdown, pasture recovery slower only for long durations (P100/C100) | Silver et al. (2000)        |
| total and vegetation C recovery rate               | temperate forest | linear with time                                                                   | P60, P100                                  | (slight) slowdown                                                              | Hooker and Compton (2003)   |
| vegetation recovery rate                           | temperate forest | linear with time                                                                   | C20, C60                                   | (slight) slowdown                                                              | Poulton et al. (2003)       |
| ag vegetation recovery rate                        | tropical forest  | recovery speed inversely related to LU duration                                    | P20, P60, P100                             | recovery speed inversely related to LU duration                                | Uhl et al. (1988)           |
| ag vegetation recovery rate and time               | tropical forest  | 73 years, recovery speed inversely related to LU duration                          | C20, C60, C100                             | 121-139 years, recovery speed inversely related to LU duration                 | Hughes et al. (1999)        |
| maximum tree height recovery rate                  | tropical forest  | recovery speed inversely related to LU duration                                    | C20, C60, C100                             | recovery speed inversely related to LU duration                                | Randriamalala et al. (2012) |
| vegetation height recovery rate                    | tropical forest  | slower for pasture than for cropland                                               | P20, P60, P100, C20, C60, C100             | slower only for long durations (C100/P100)                                     | Moran et al. (2000)         |
| ag vegetation                                      | tropical         | slower for pasture than                                                            | P20, C20                                   | faster for P20 than for                                                        | Wandelli and                |

|                                                |                          |                                                                                                                          |                                |                                                                                          |                         |
|------------------------------------------------|--------------------------|--------------------------------------------------------------------------------------------------------------------------|--------------------------------|------------------------------------------------------------------------------------------|-------------------------|
| recovery rate                                  | forest                   | for cropland                                                                                                             |                                | C20                                                                                      | Fearnside (2015)        |
| soil C recovery after agricultural abandonment |                          |                                                                                                                          |                                |                                                                                          |                         |
| soil C recovery at up to 30 cm                 | global                   | large variation across studies, tendency to lose C in the first years for pastures, immediate accumulation for croplands | P20, P60, P100, C20, C60, C100 | tendency to lose C in the first years for pastures, immediate accumulation for croplands | Paul et al. (2002)      |
| soil C recovery at 34 cm                       | global                   | more accumulation for croplands than for pastures, no accumulation in boreal zone                                        | P20, P60, P100, C20, C60, C100 | more accumulation for croplands than for pastures, slower accumulation in boreal zone    | Laganiere et al. (2010) |
| soil C recovery at 28/40 cm                    | temperate forest         | linear accumulation, no equilibrium after 120 years                                                                      | C20                            | linear accumulation, no equilibrium after 120 years                                      | Poeplau et al. (2011)   |
| soil C recovery time at 0-60 cm                | grassland                | 158 years                                                                                                                | C100                           | 198 years                                                                                | Potter et al. (1999)    |
| soil C recovery time at 0-60 cm                | savanna/temperate forest | 230 years                                                                                                                | C20                            | 85 (savanna) / 237 (temperate forest) years                                              | Knops and Tilman (2000) |
| soil C recovery time 0-10 cm                   | temperate forest         | >100 years                                                                                                               | C20, C60, C100                 | 237-261 years                                                                            | Foote and Grogan (2010) |
| soil C recovery time 0-25 cm                   | tropical forest          | 50-60 years                                                                                                              | P20, P60, P100, C20, C60, C100 | 49-80 years                                                                              | Silver et al. (2000)    |

Table A1: Plant Functional Types used in this study.

|       |                                                       |
|-------|-------------------------------------------------------|
| BNE   | Boreal needleleaved evergreen tree                    |
| BINE  | Boreal shade-intolerant needleleaved evergreen tree   |
| BNS   | Boreal needleleaved summergreen tree                  |
| TeBS  | Shade-tolerant temperate broadleaved summergreen tree |
| IBS   | Shade-intolerant broadleaved summergreen tree         |
| TeBE  | Temperate broadleaved evergreen tree                  |
| TrBE  | Tropical broadleaved evergreen tree                   |
| TrIBE | Tropical shade-intolerant broadleaved evergreen tree  |
| TrBR  | Tropical broadleaved raingreen tree                   |
| C3G   | Cool C3 grass                                         |
| C4G   | Warm C4 grass                                         |
